# Supplementary material for: Identification of unusual C–Cl⋯π contacts in 2-(alkylamino)-3-chloro-1,4-naphthoquinones: effect of N-substituents on crystal packing, fluorescence, redox and anti-microbial properties
Source: Royal Society of Chemistry journal article supplement (doi:10.1039/c5ra02295a), 2015-01-01
Supplement: c5ra02295a1.pdf [file c5ra02295a1.pdf]

**Identification of unusual C–Cl... $\pi$  contacts in 2-(alkylamino)-3-chloro-1,4-naphthoquinones: Effect of *N*-substituents on crystal packings, fluorescence, redox and anti-microbial properties**

Vinay K Singh,<sup>\* a</sup> Sanjay K Verma,<sup>a</sup> Rahul Kadu<sup>a</sup> and Shaikh M. Mobin<sup>b</sup>

<sup>a</sup> Department of Chemistry, Faculty of Science, The M. S. University of Baroda, Vadodara-390 002, India;

<sup>b</sup> National Single Crystal X-ray Diffraction Facility, IIT Bombay, Powai, Mumbai 400 076, India

Email: [vks.msu@gmail.com](mailto:vks.msu@gmail.com)

## Supplementary Information

1. **IR spectra:** The IR spectra of secondary amines summarized below as Fig. S1 to S7.

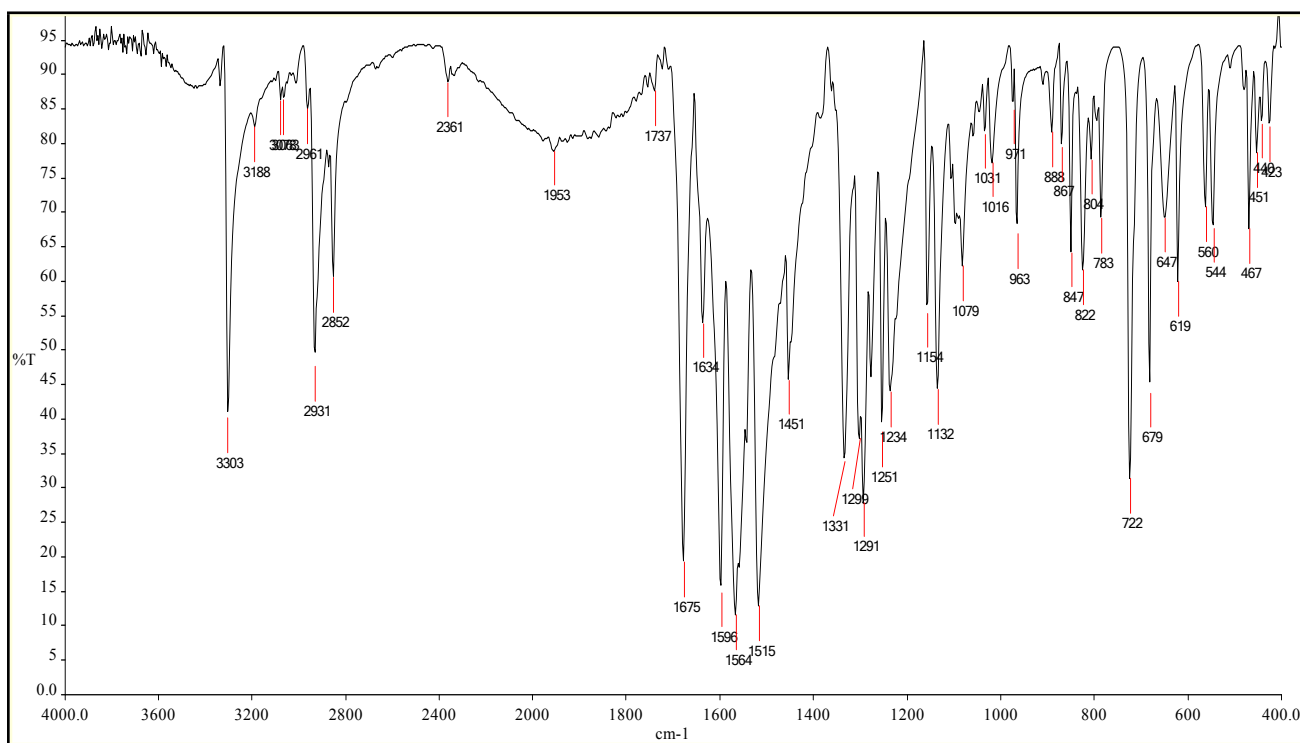

Fig. S1: IR Spectrum of compound 1

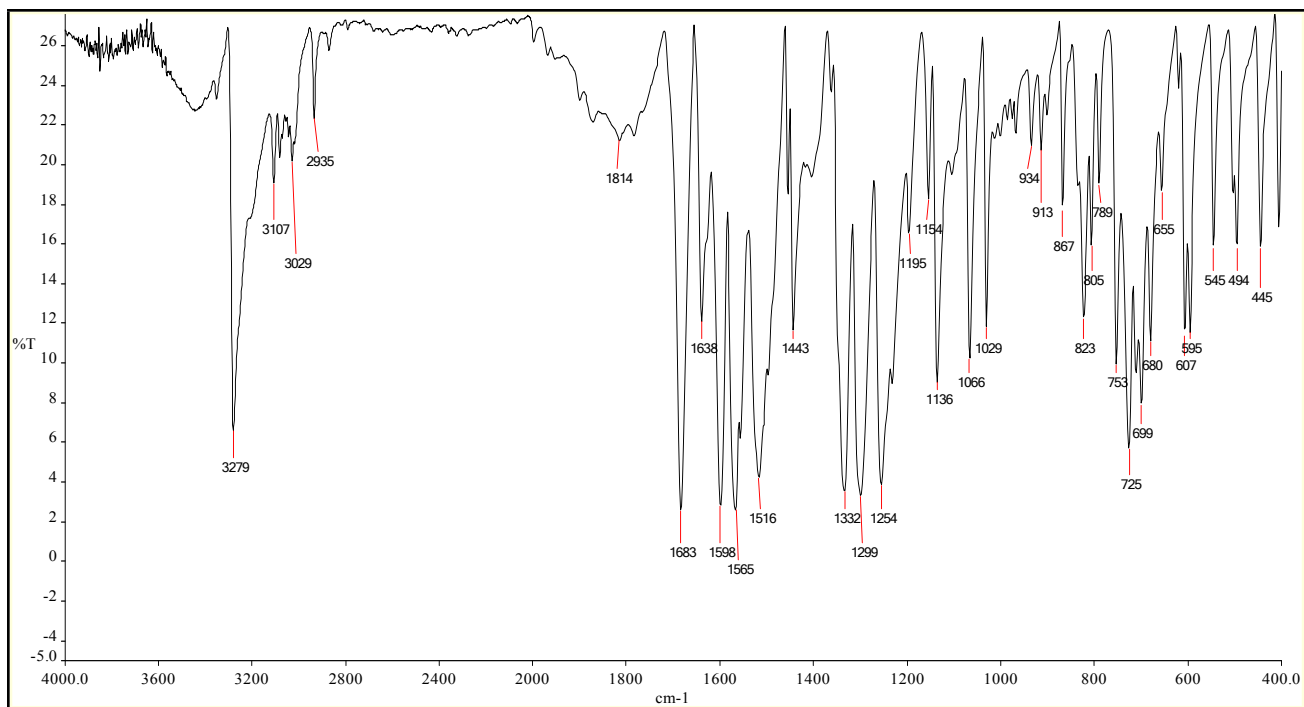

Fig. S2: IR Spectrum of compound 2

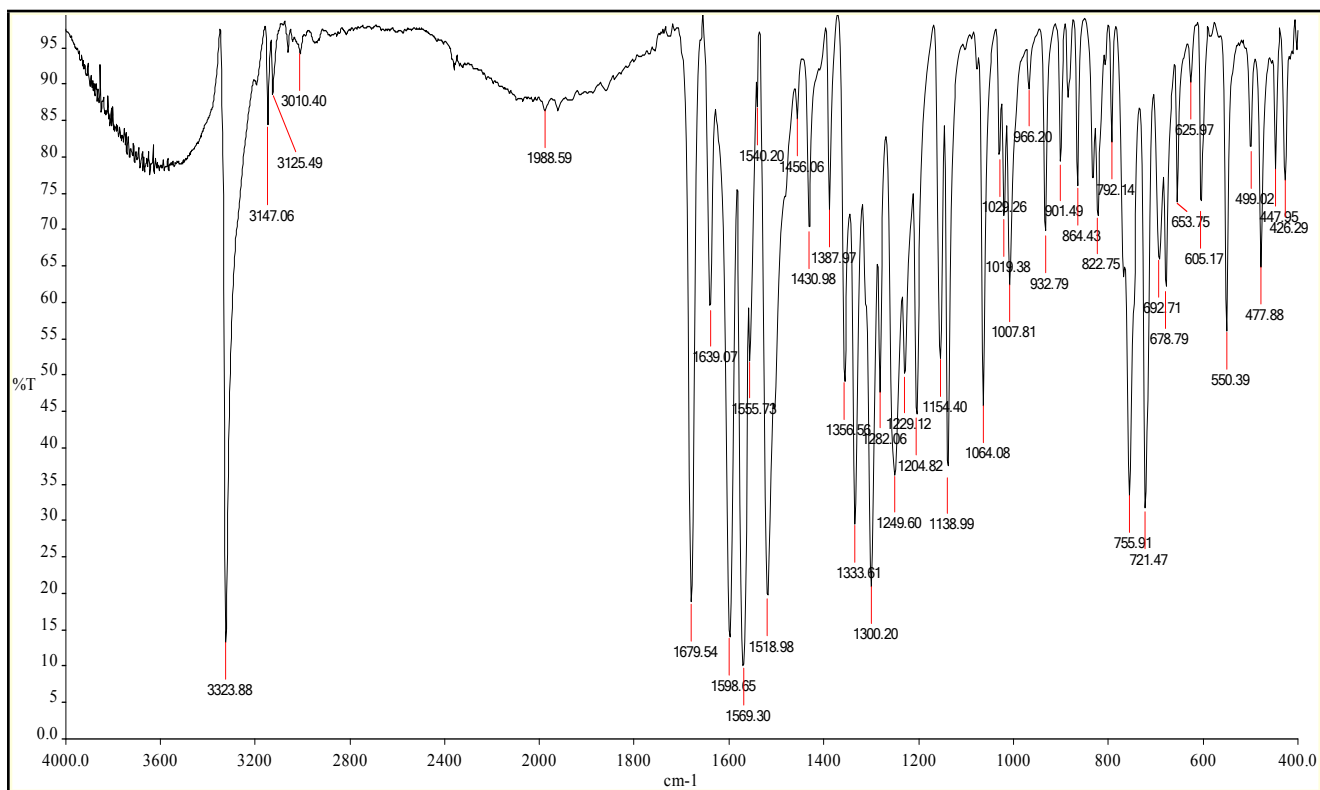

Fig. S3: IR Spectrum of compound 3

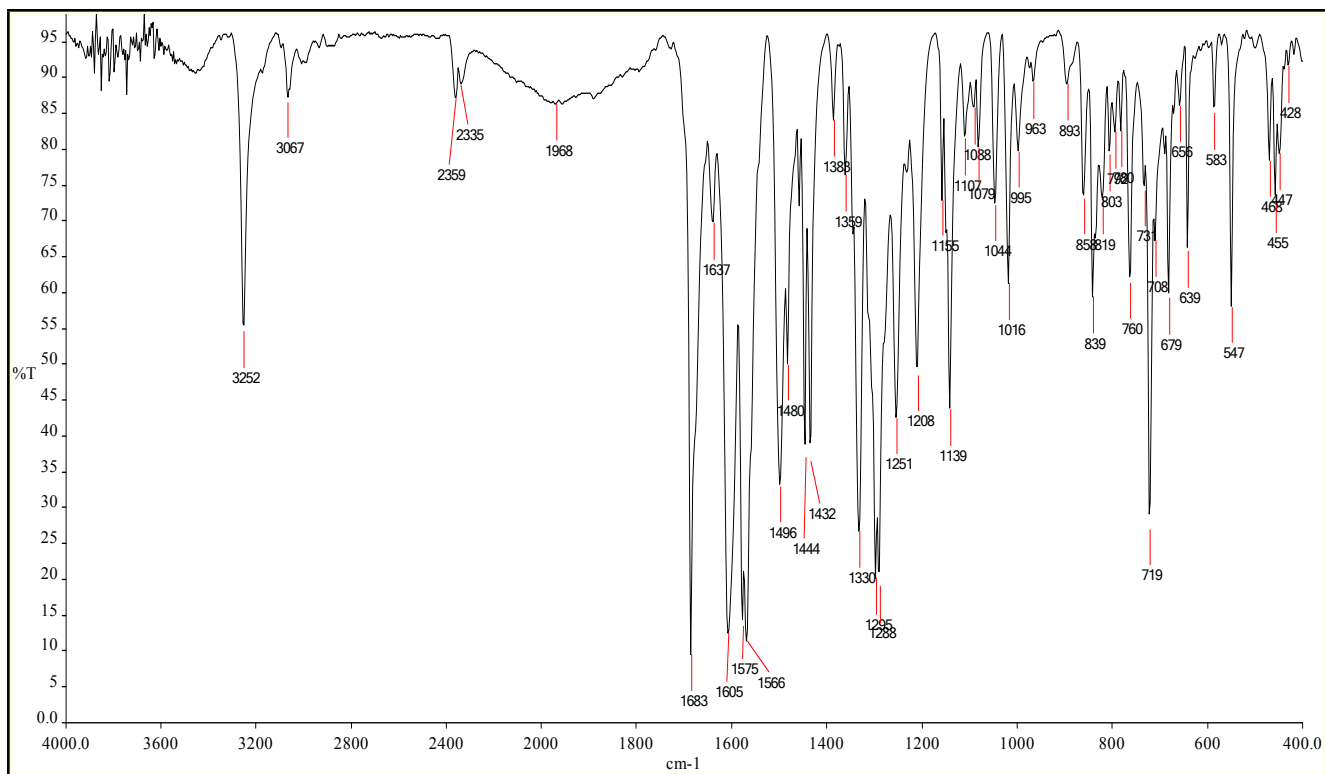

Fig. S4: IR Spectrum of compound 4

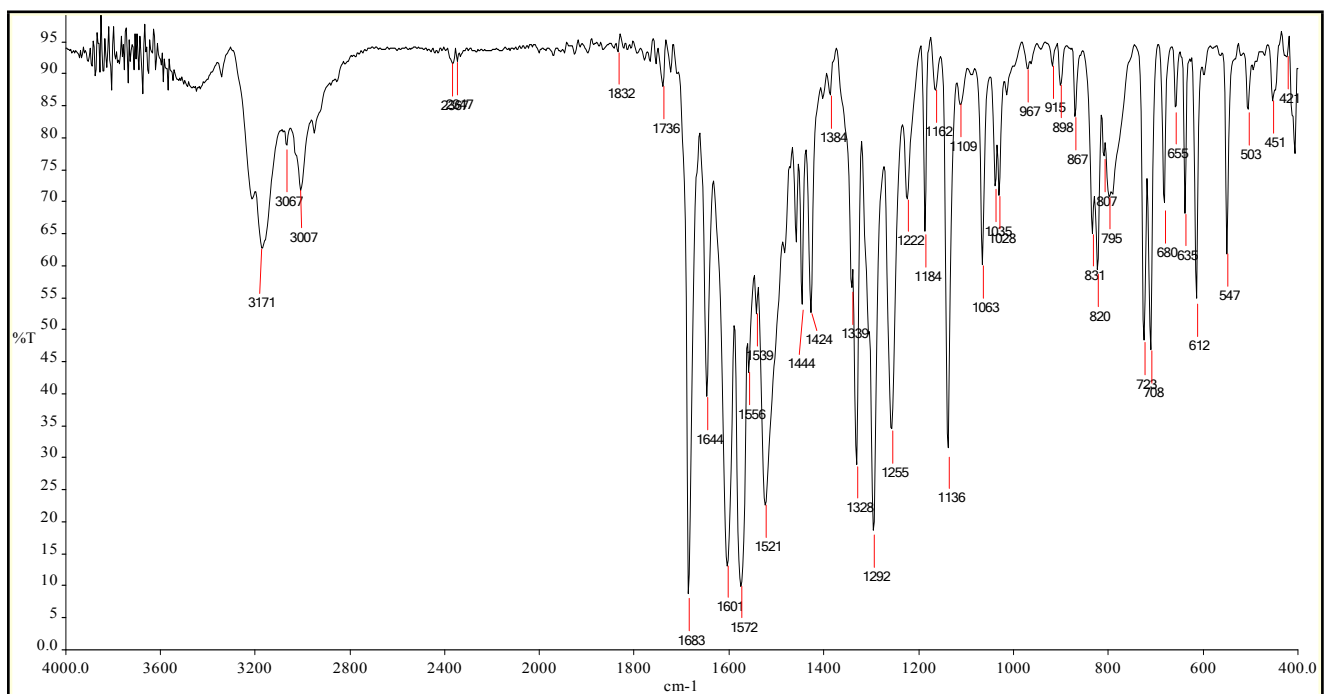

Fig. S5: IR Spectrum of compound 5

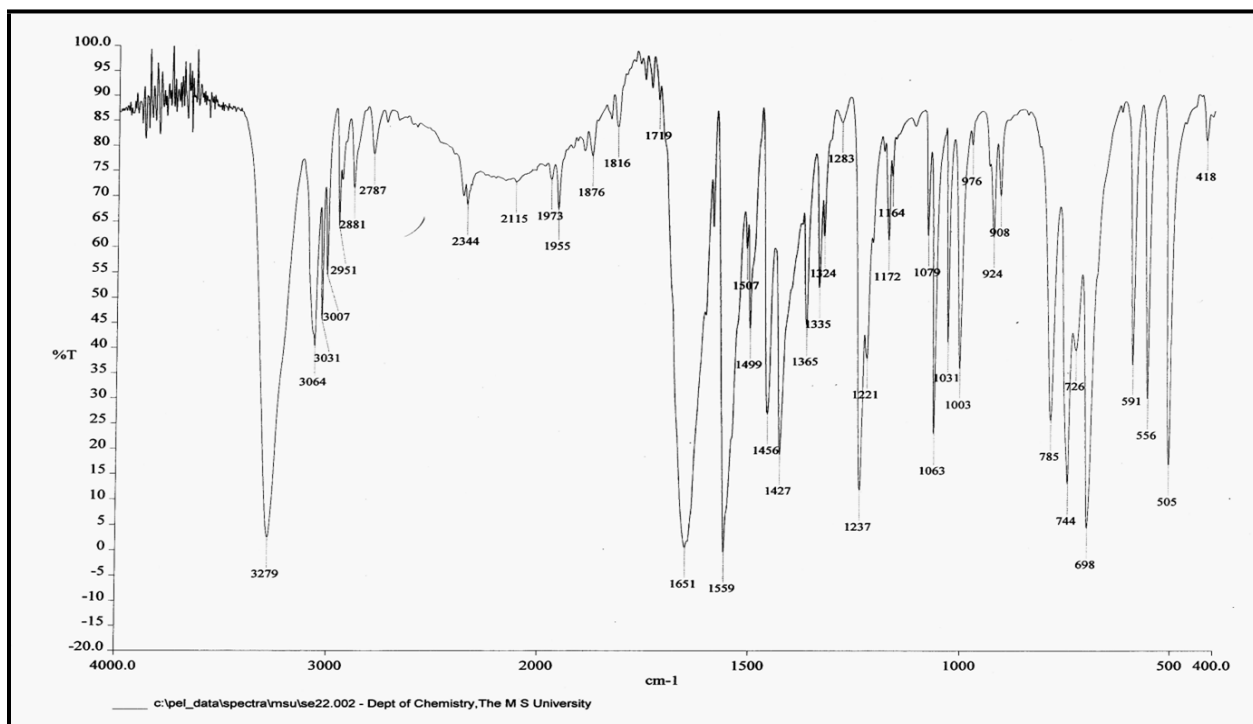

Fig. S6: IR Spectrum of compound 6

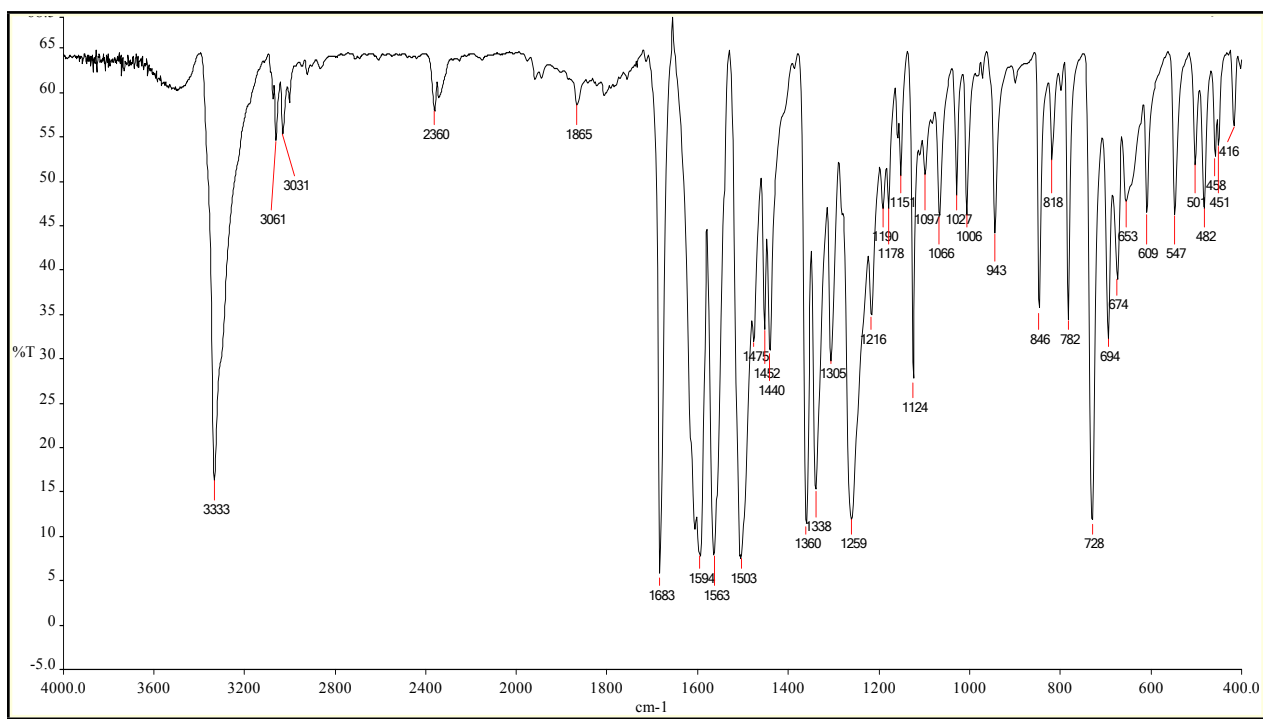

Fig. S7: IR Spectrum of compound 7

2. **NMR spectra:** The NMR spectra of secondary amines summarized below as Fig. S8 to S21.

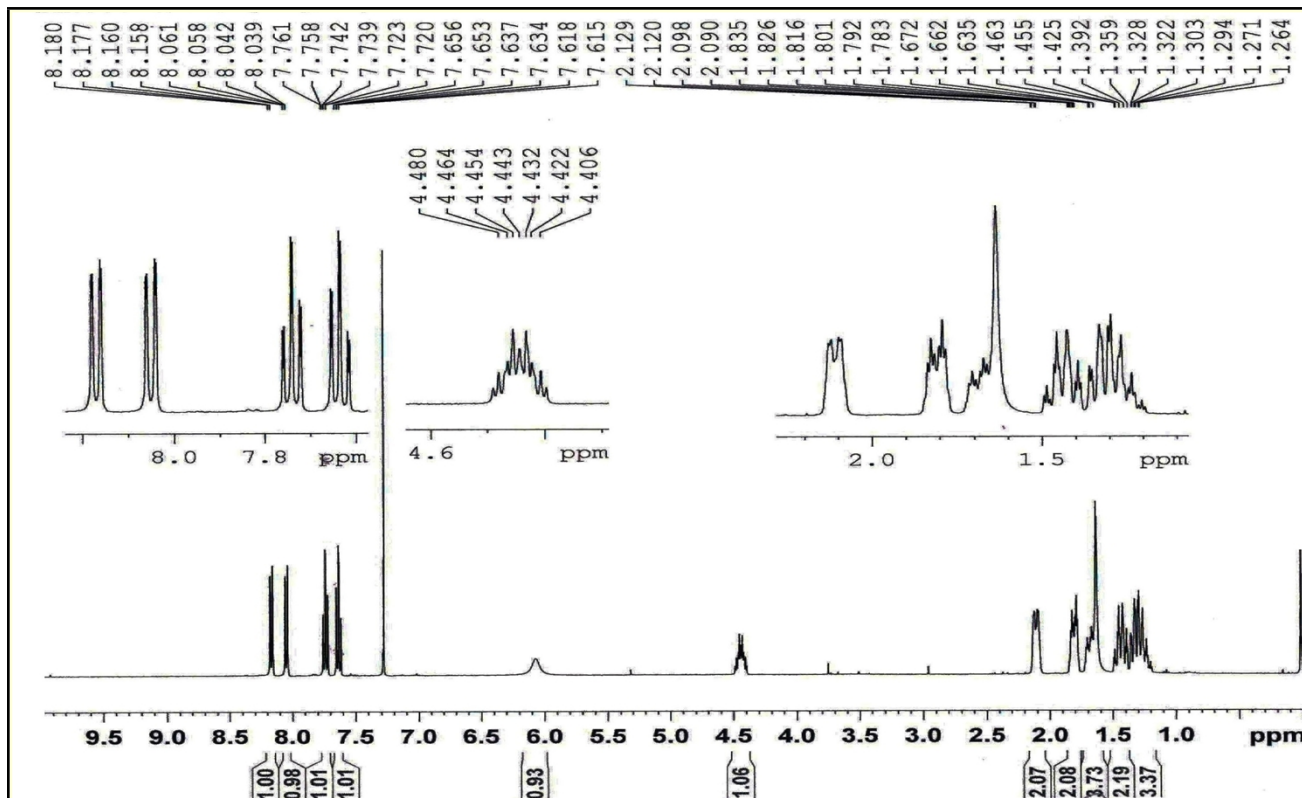

Fig. S8: <sup>1</sup>H NMR spectrum of compound 1

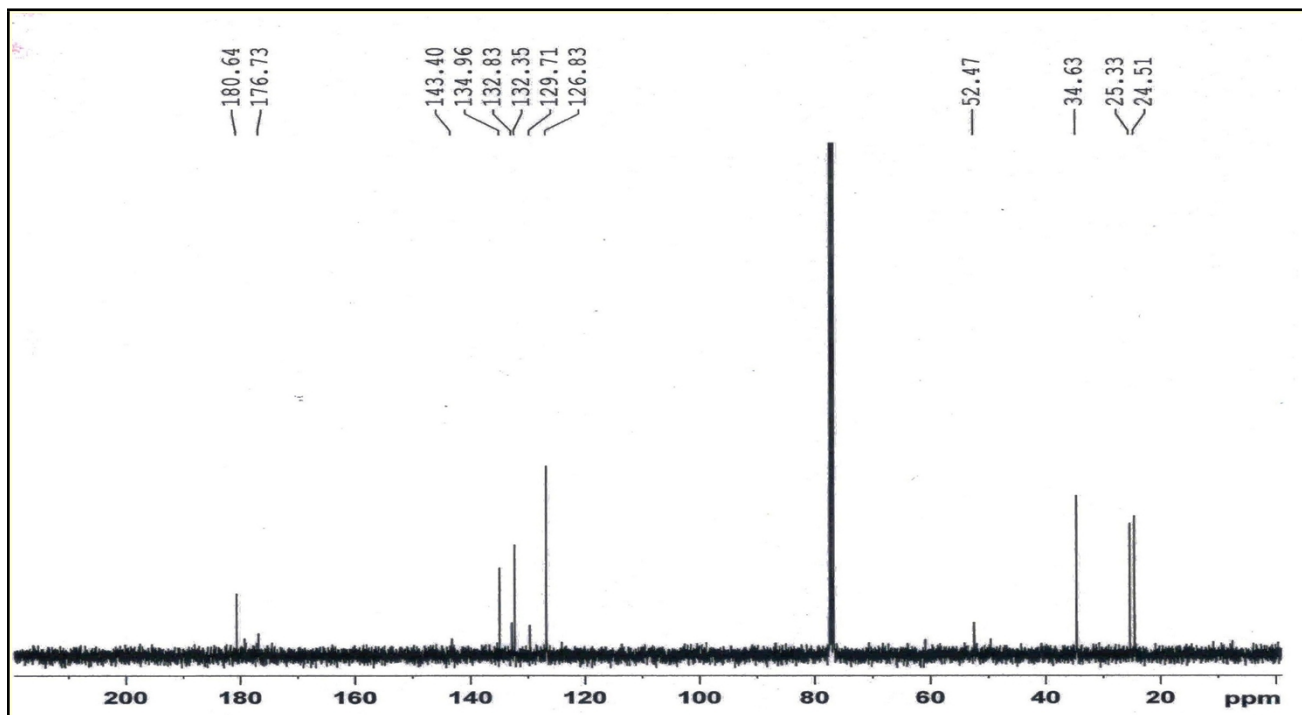



Fig. S11:  $^{13}\text{C}$  NMR spectrum of compound 2

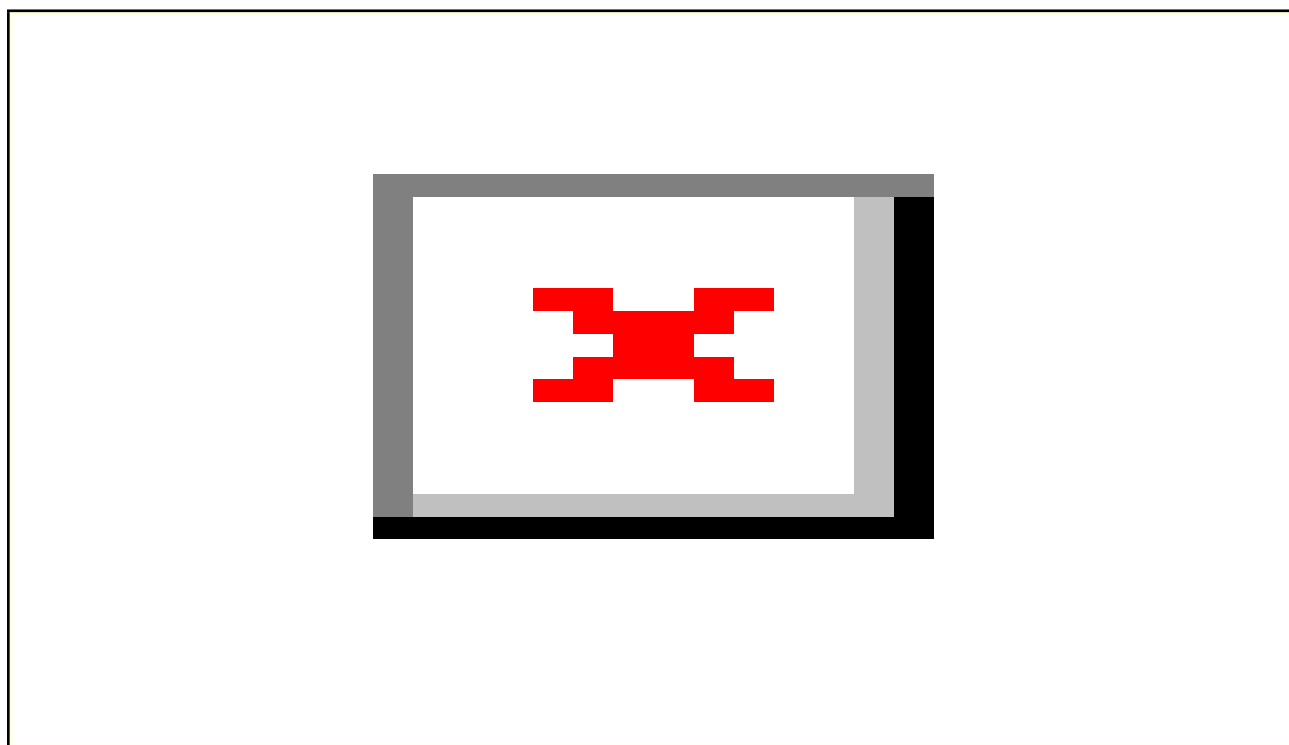

Fig. S12:  $^1\text{H}$  NMR spectrum of compound 3

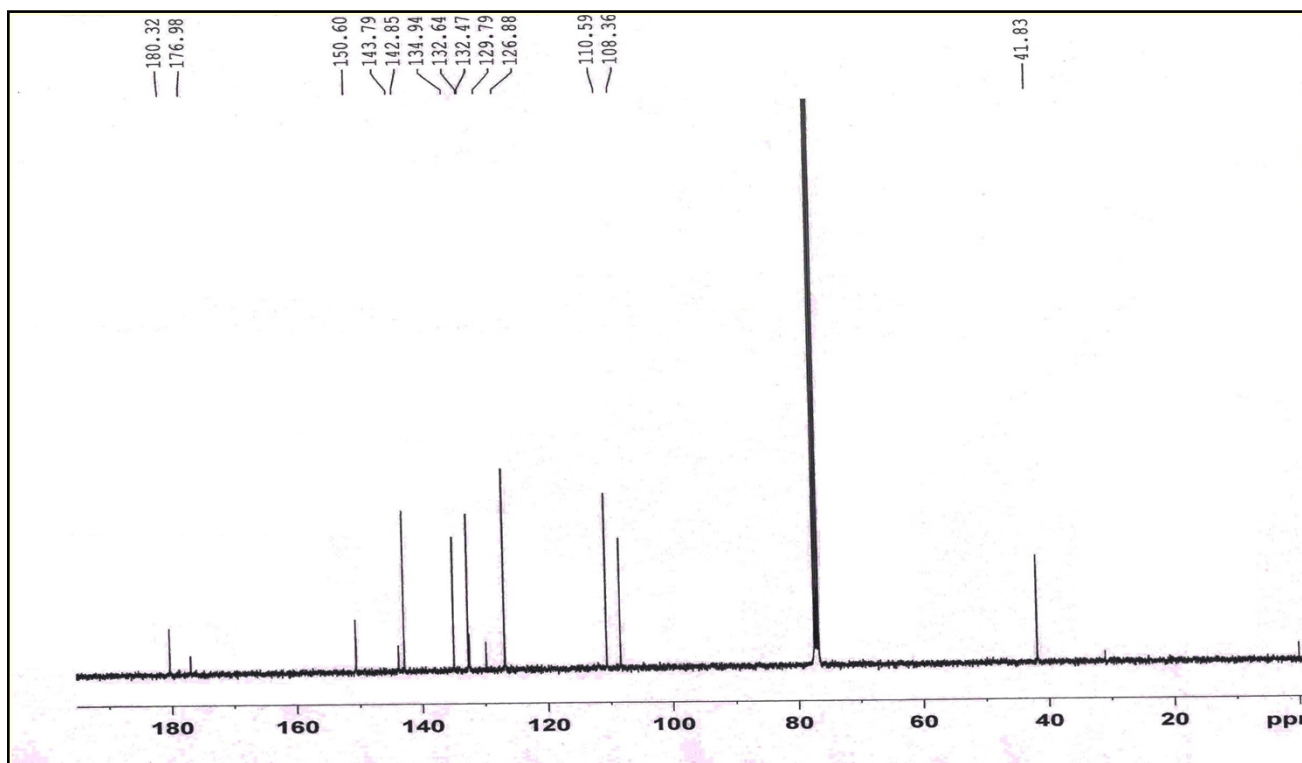

Fig. S13:  $^{13}\text{C}$  NMR spectrum of compound 3

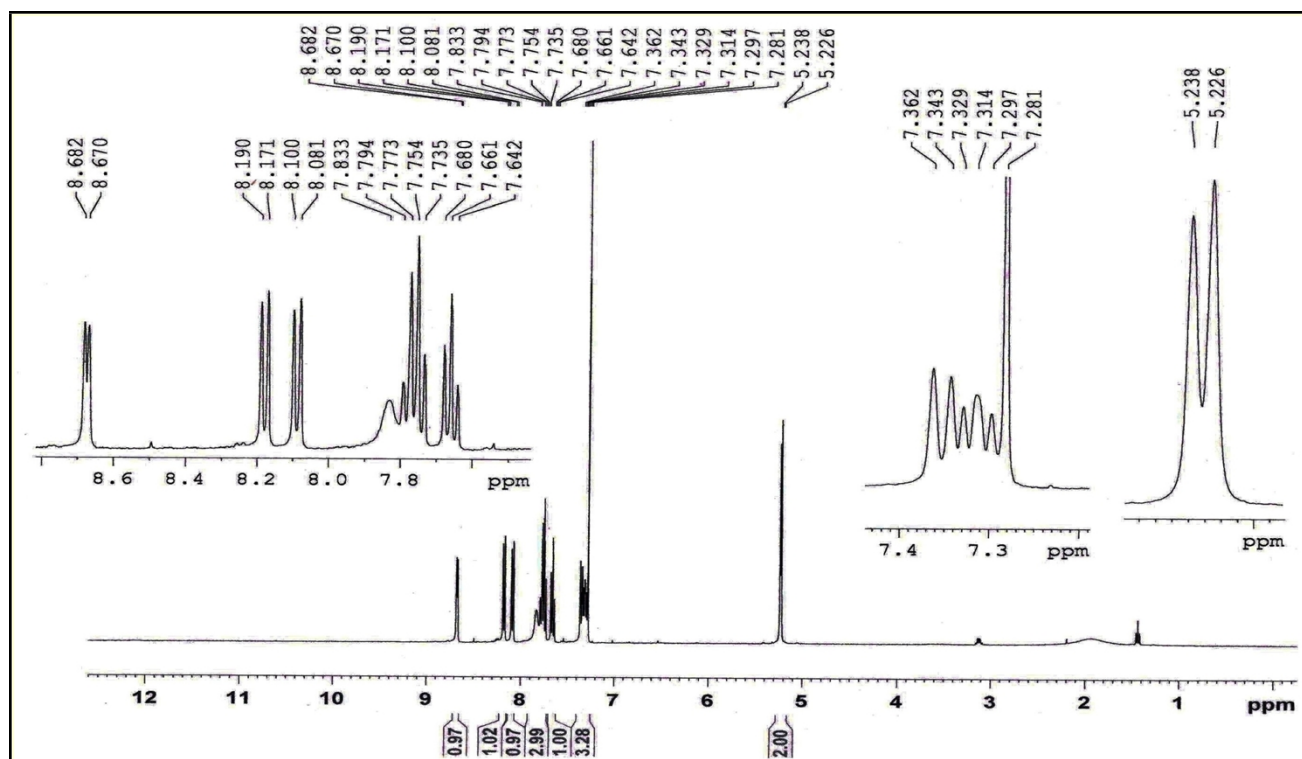

Fig. S14:  $^1\text{H}$  NMR spectrum of compound 4

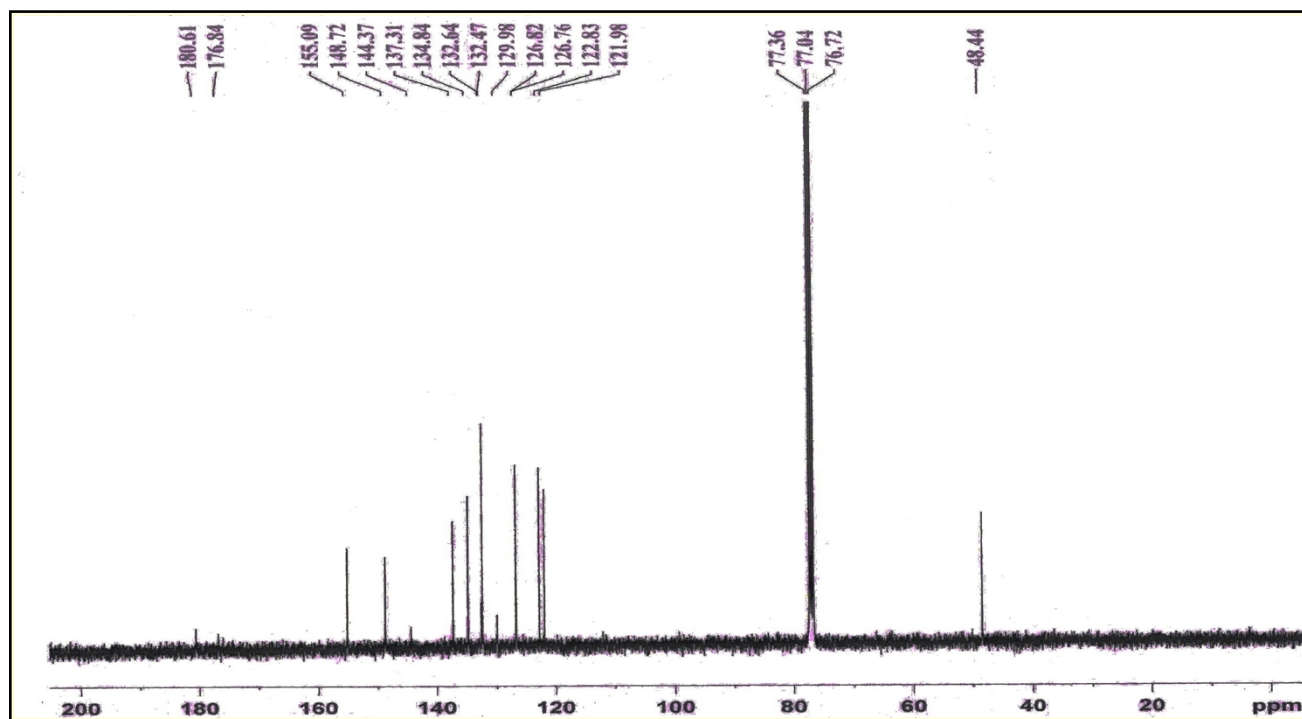

Fig. S15:  $^{13}\text{C}$  NMR spectrum of compound 4



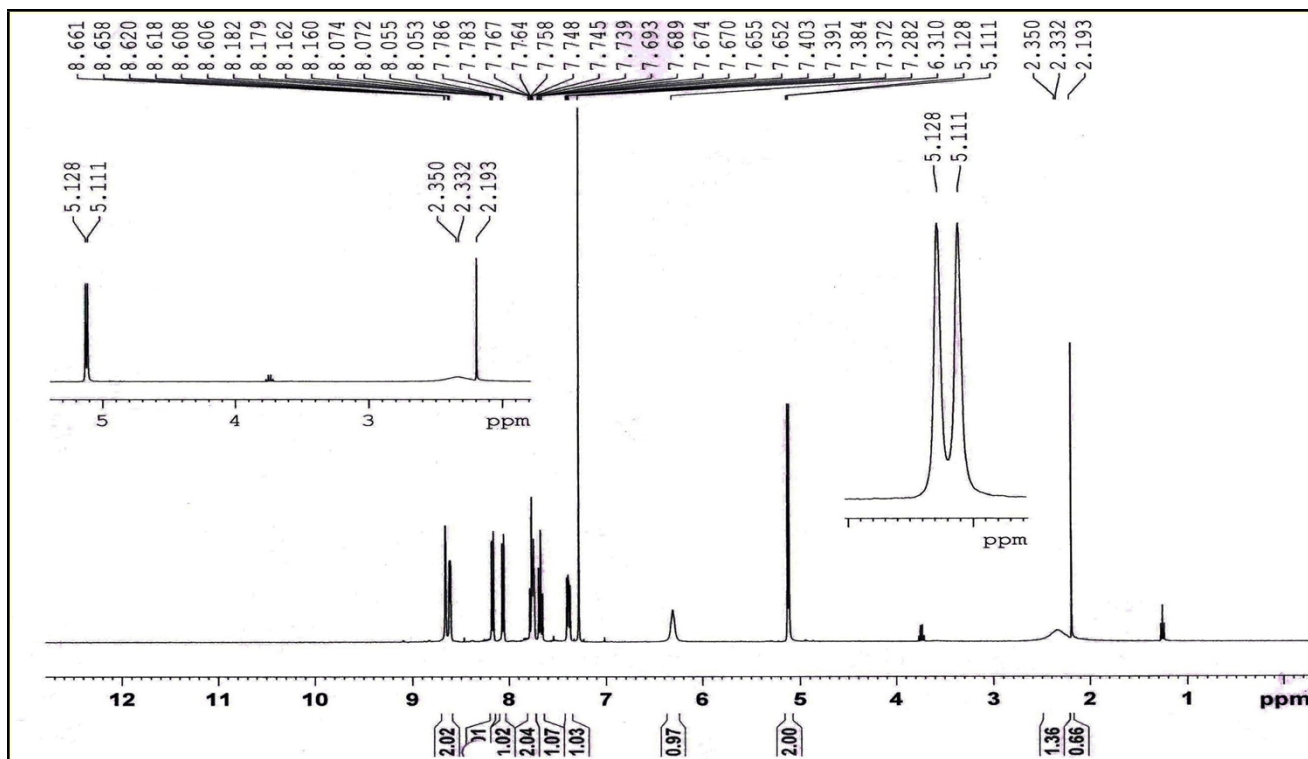

Fig. S16:  $^1\text{H}$  NMR spectrum of compound 5

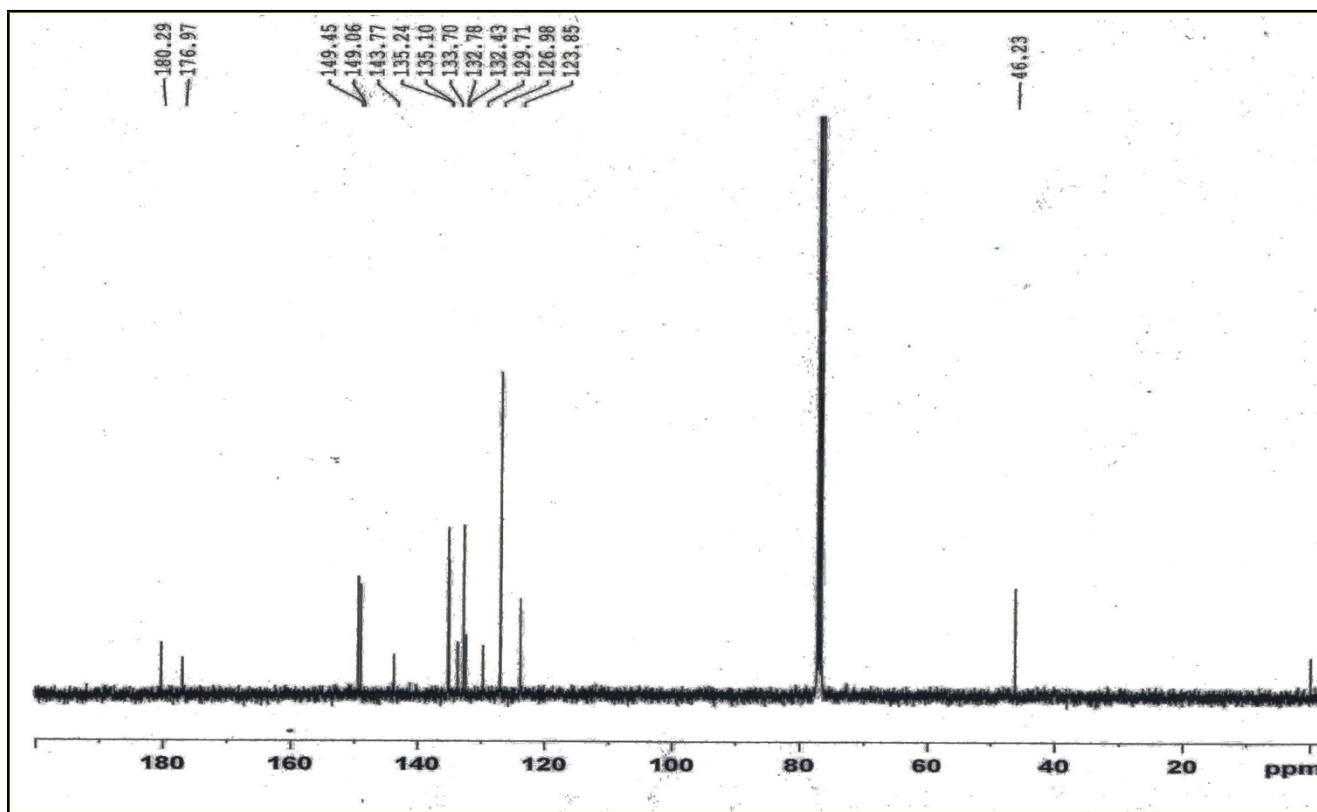

Fig. S17:  $^{13}\text{C}$  NMR spectrum of compound 5

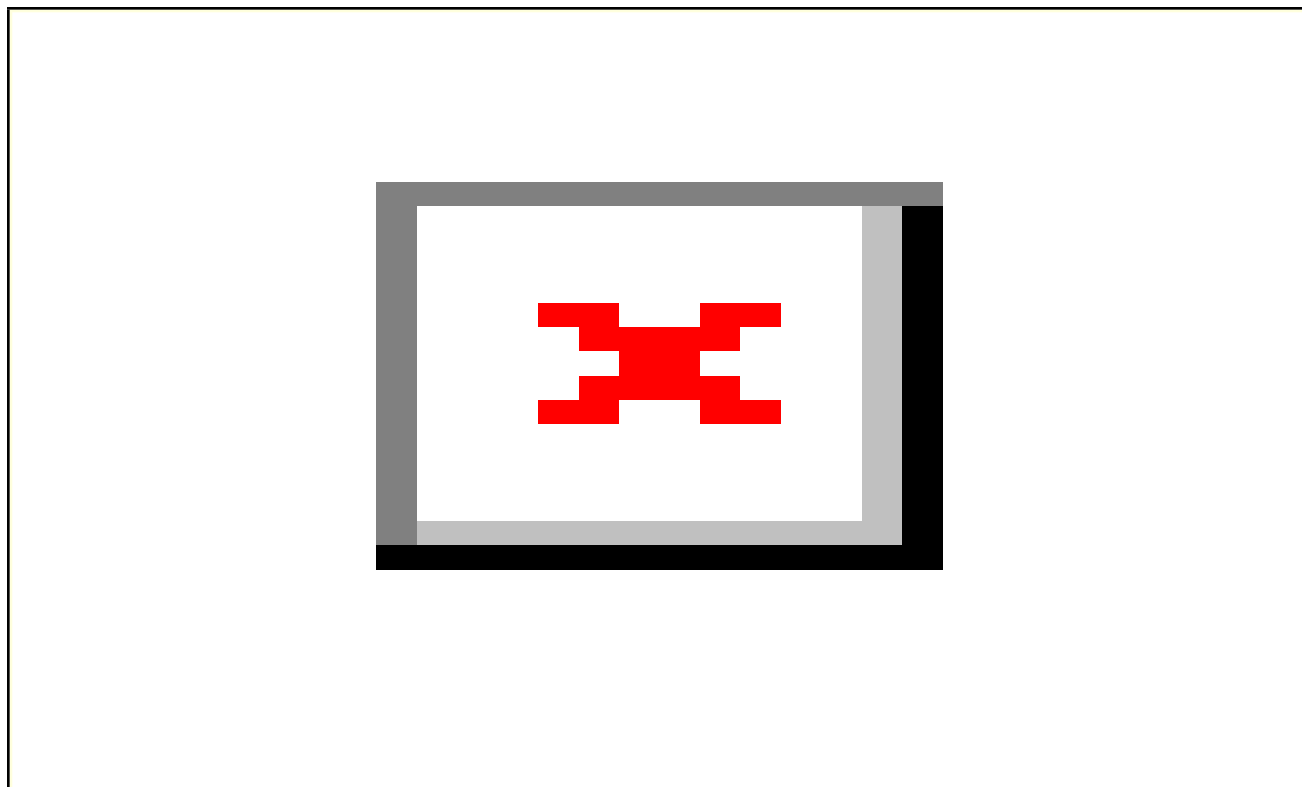

Fig. S18:  $^1\text{H}$  NMR spectrum of compound 6

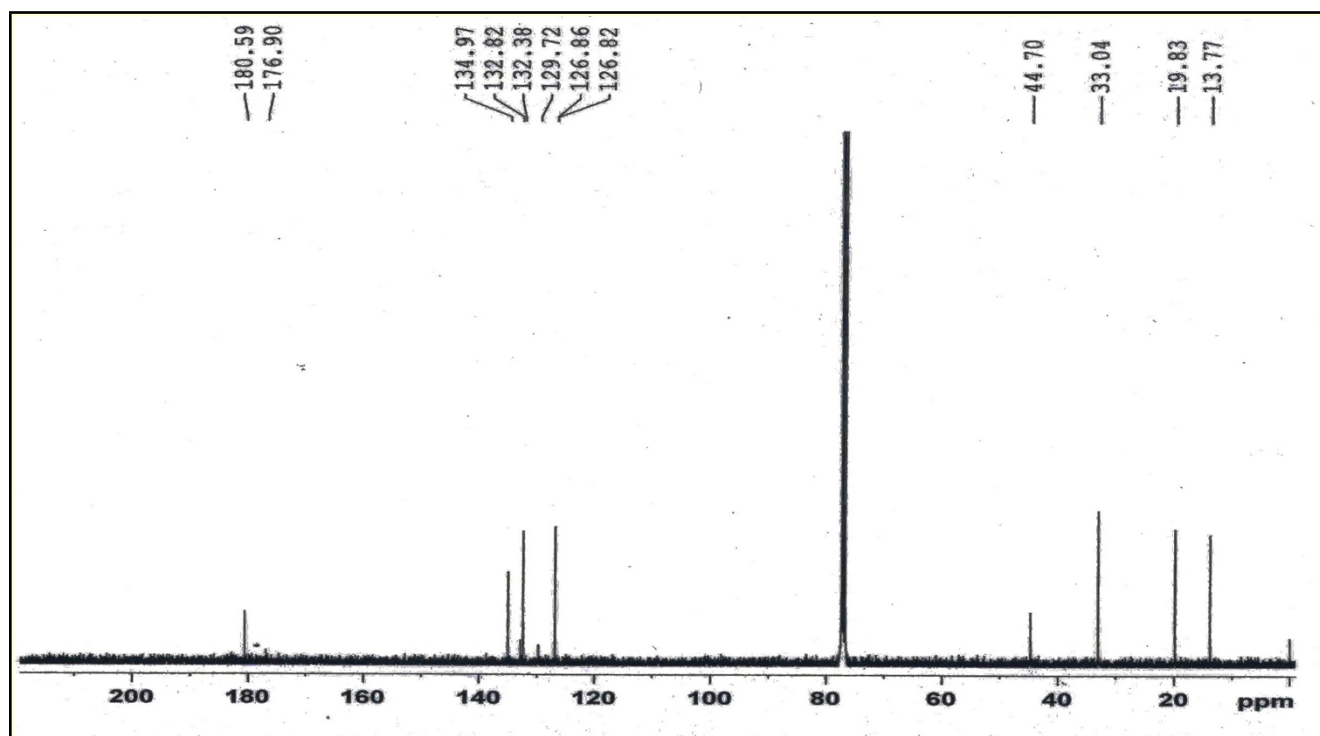

Fig. S19:  $^{13}\text{C}$  NMR spectrum of compound 6

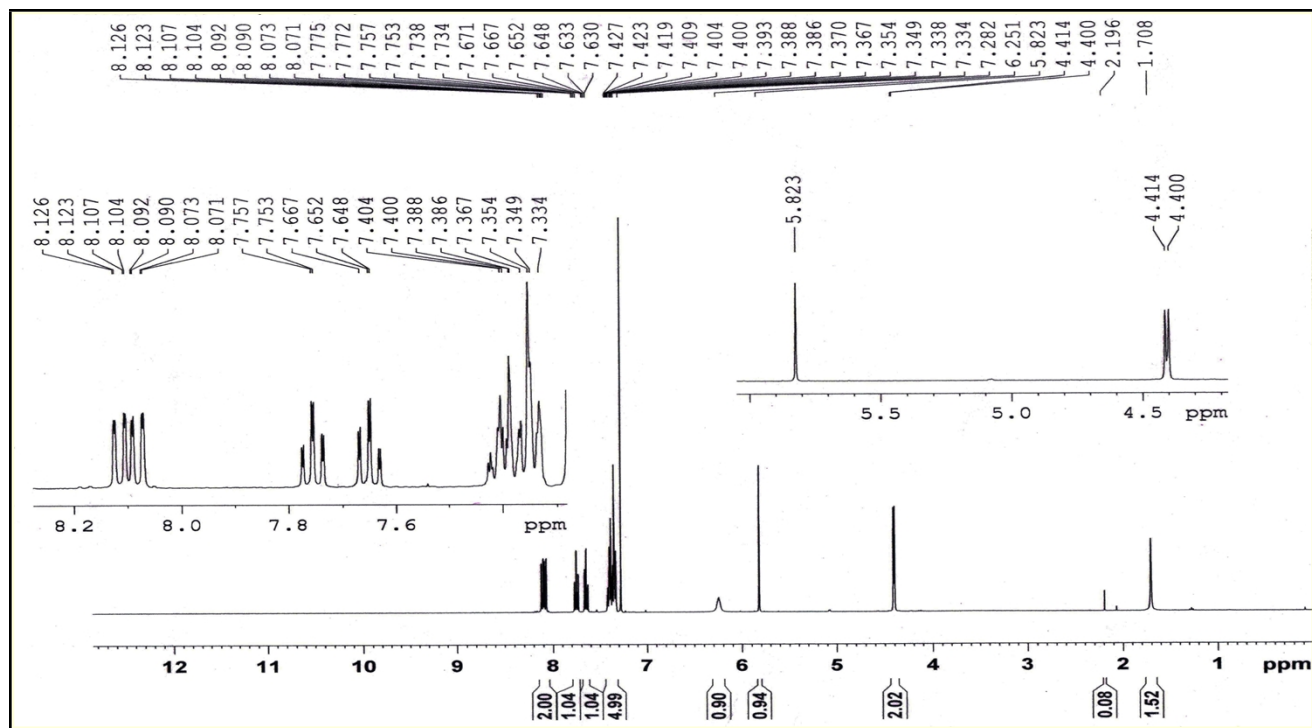

Fig. S20:  $^1\text{H}$  NMR spectrum of compound 7

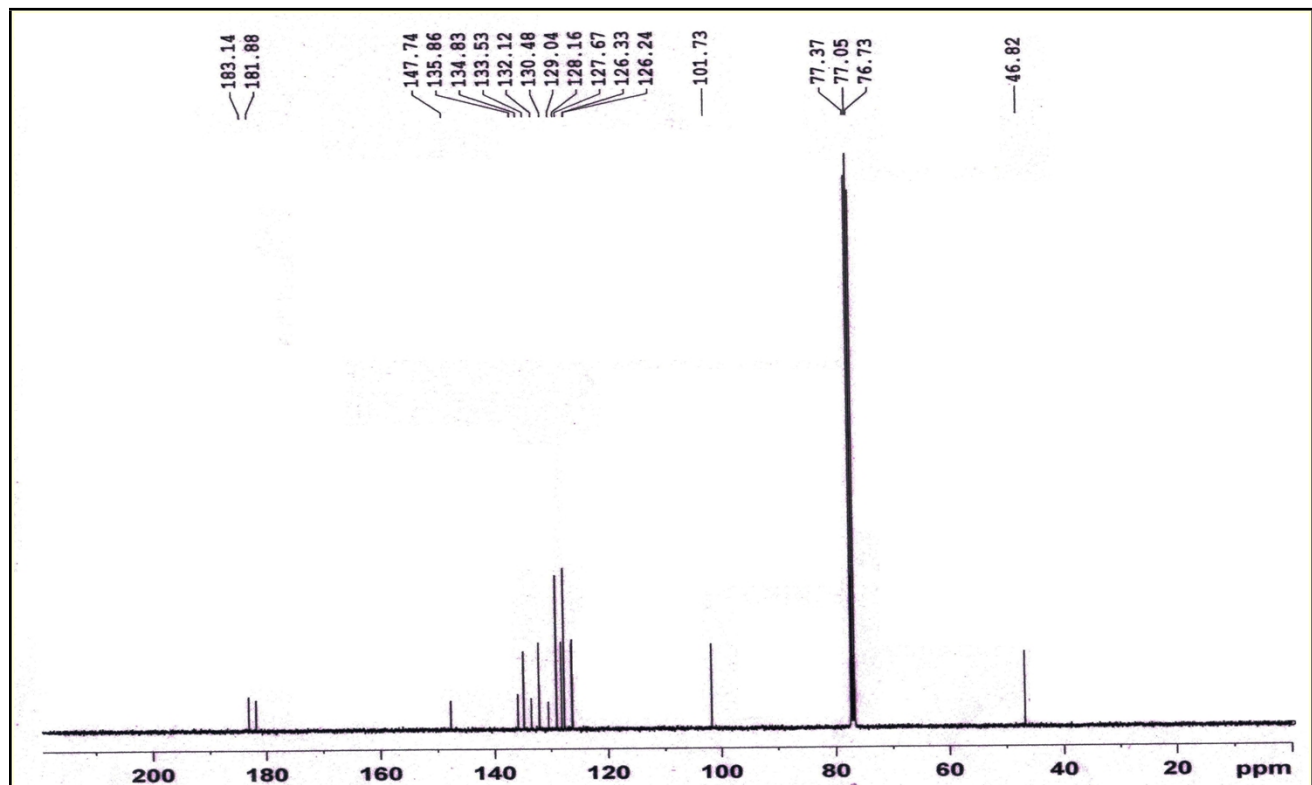

Fig. S21:  $^{13}\text{C}$  NMR spectrum of compound 7

3. GC MS spectra: The GC MS spectra of compounds are summarized below as Fig. S22 to S28

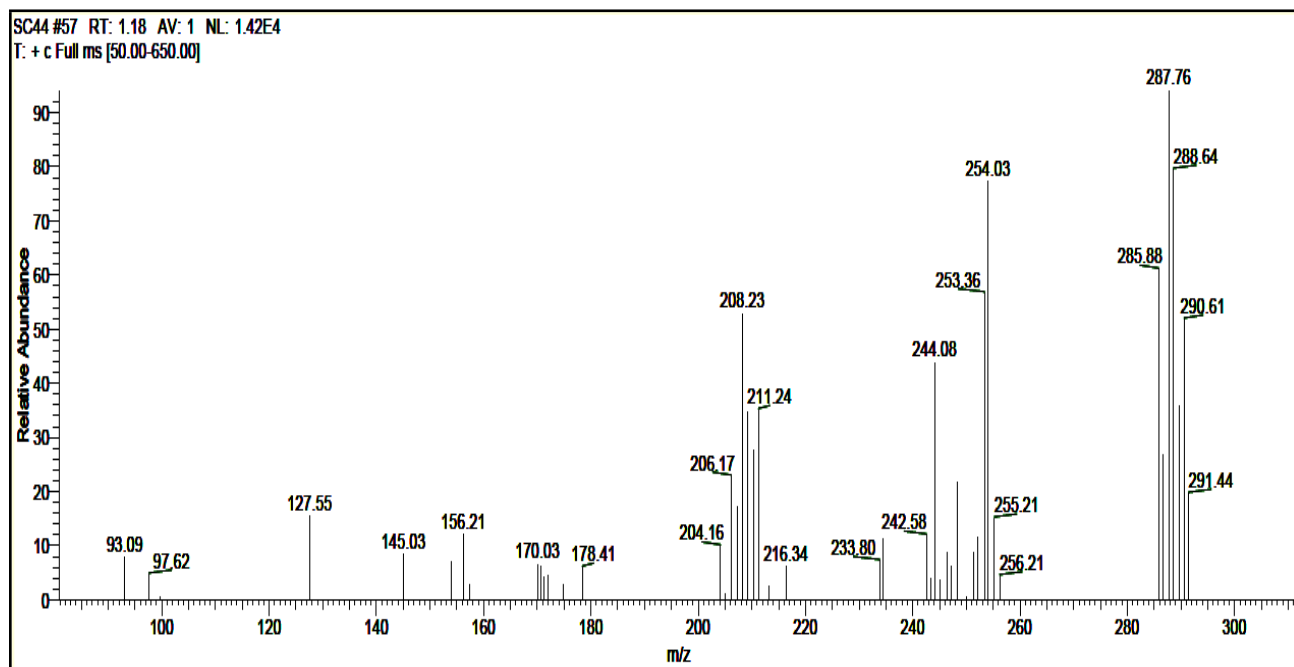

Fig. S22: GC MS spectra of compound 1

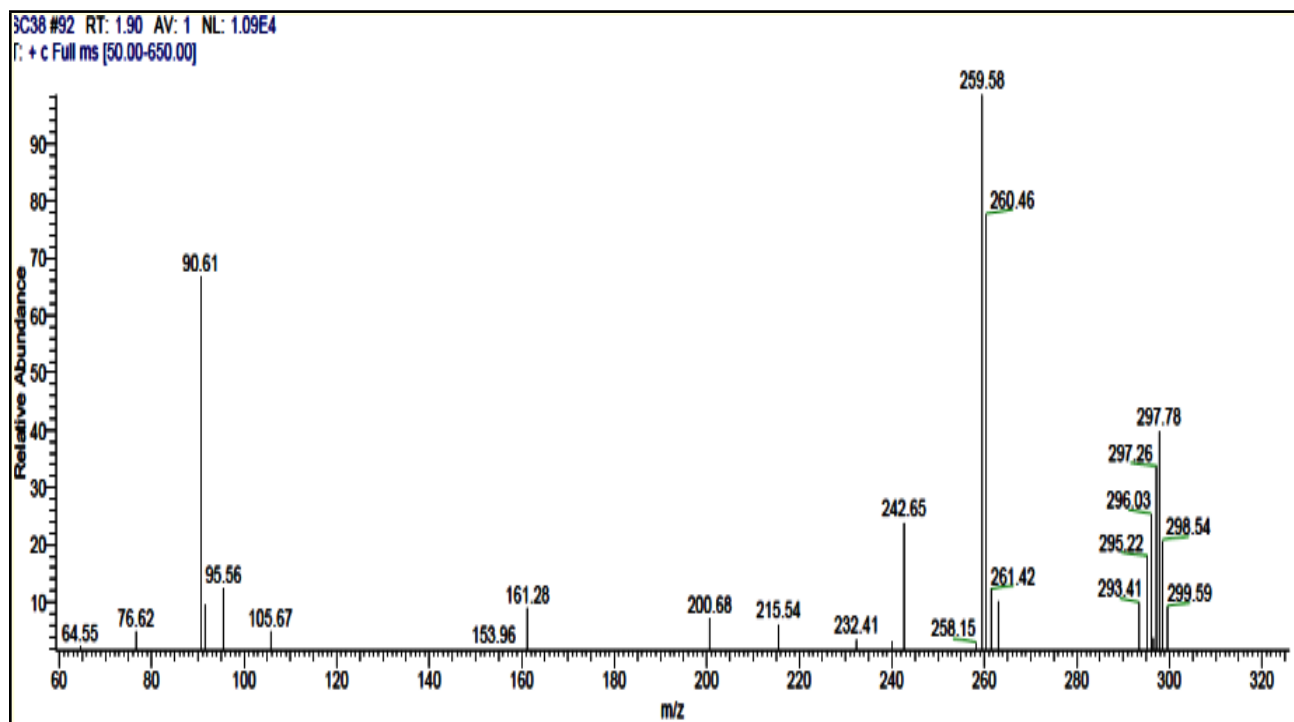

Fig. S23: GC MS spectra of compound 2

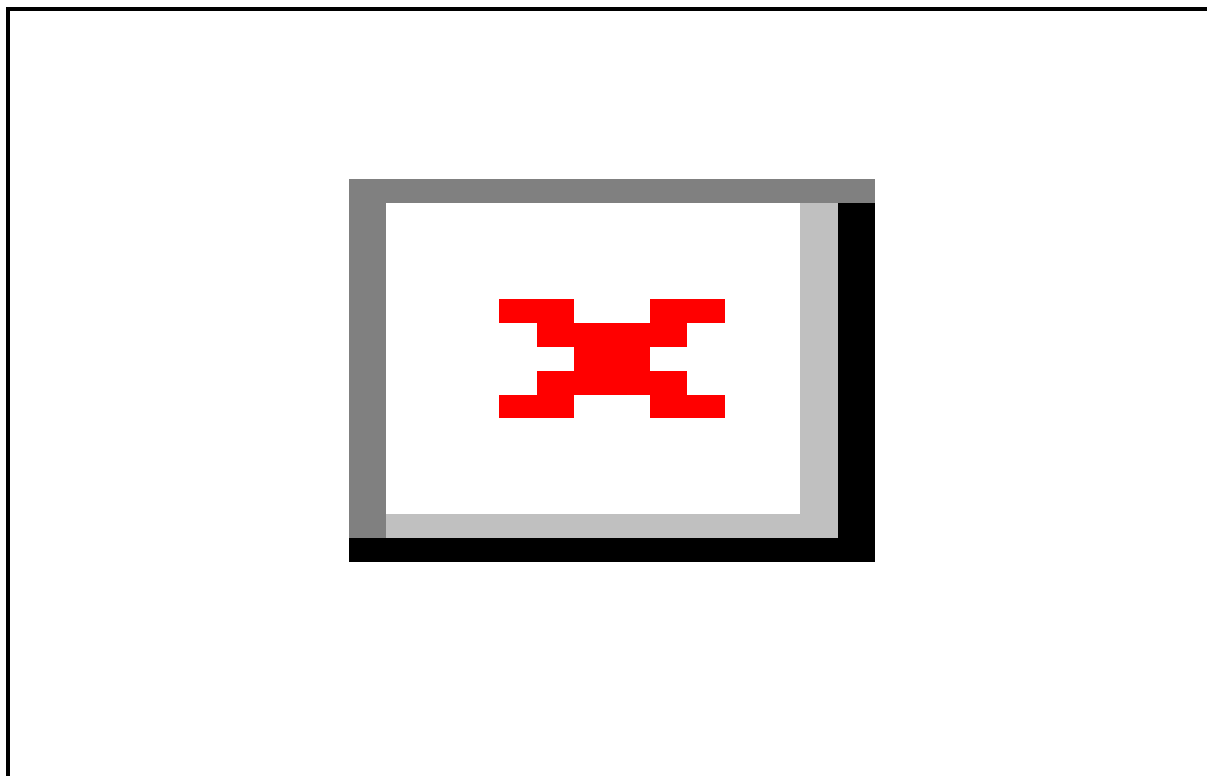

Fig. S24: GC MS spectra of compound 3

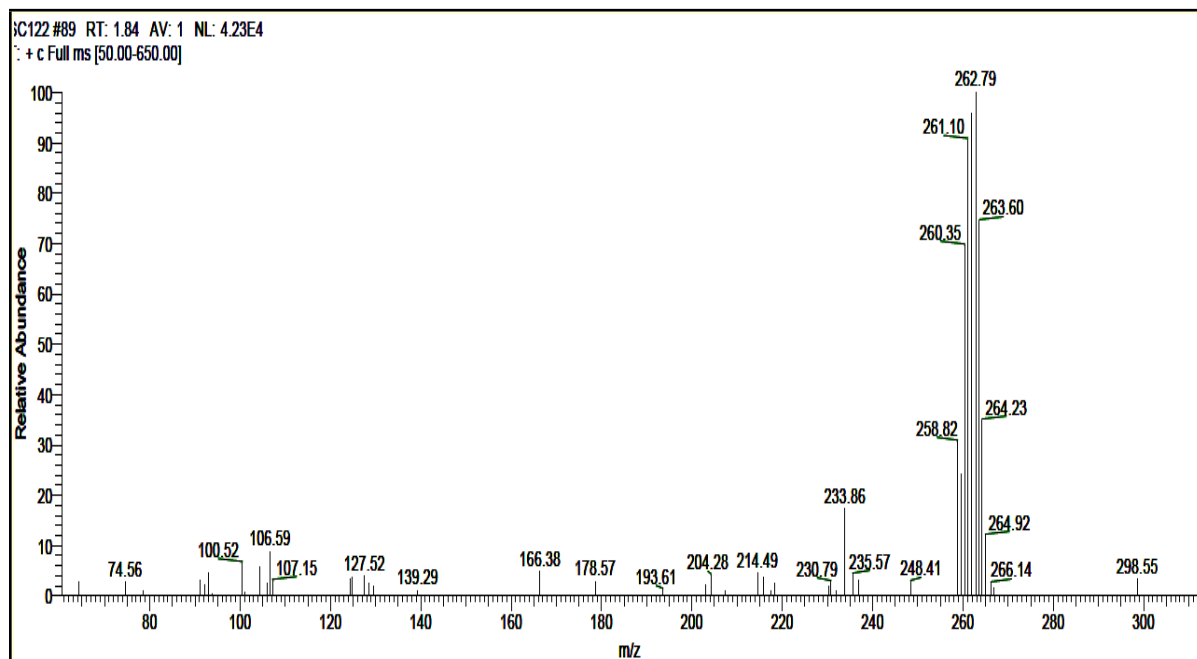

Fig. S25: GC MS spectra of compound 4

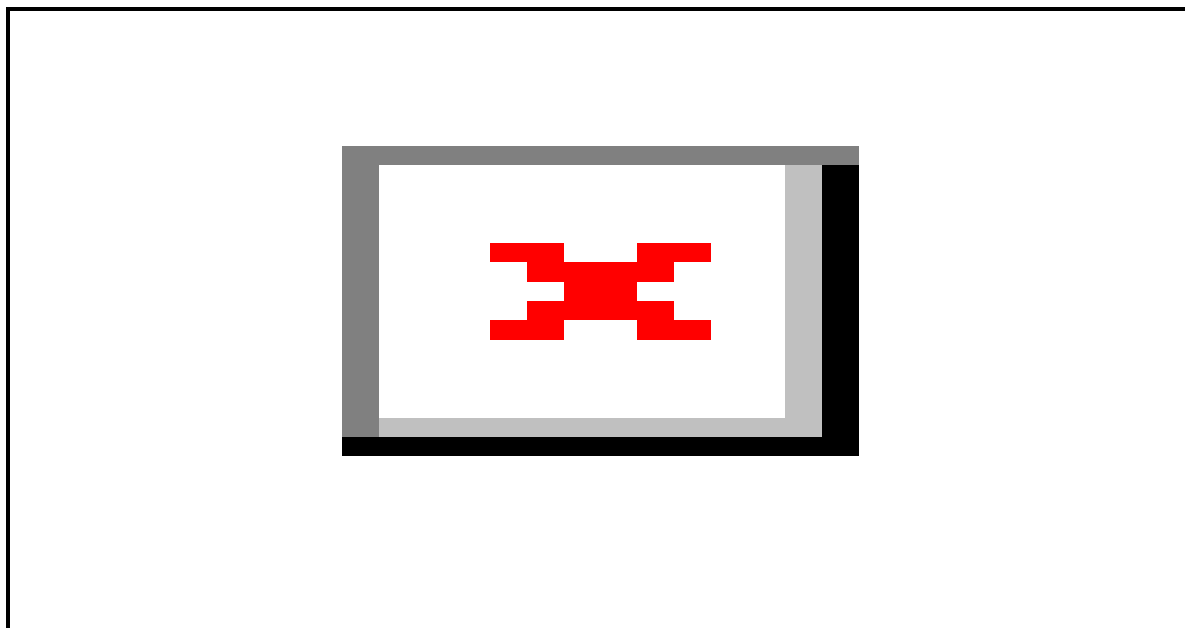

Fig. S26: GC MS spectra of compound 5

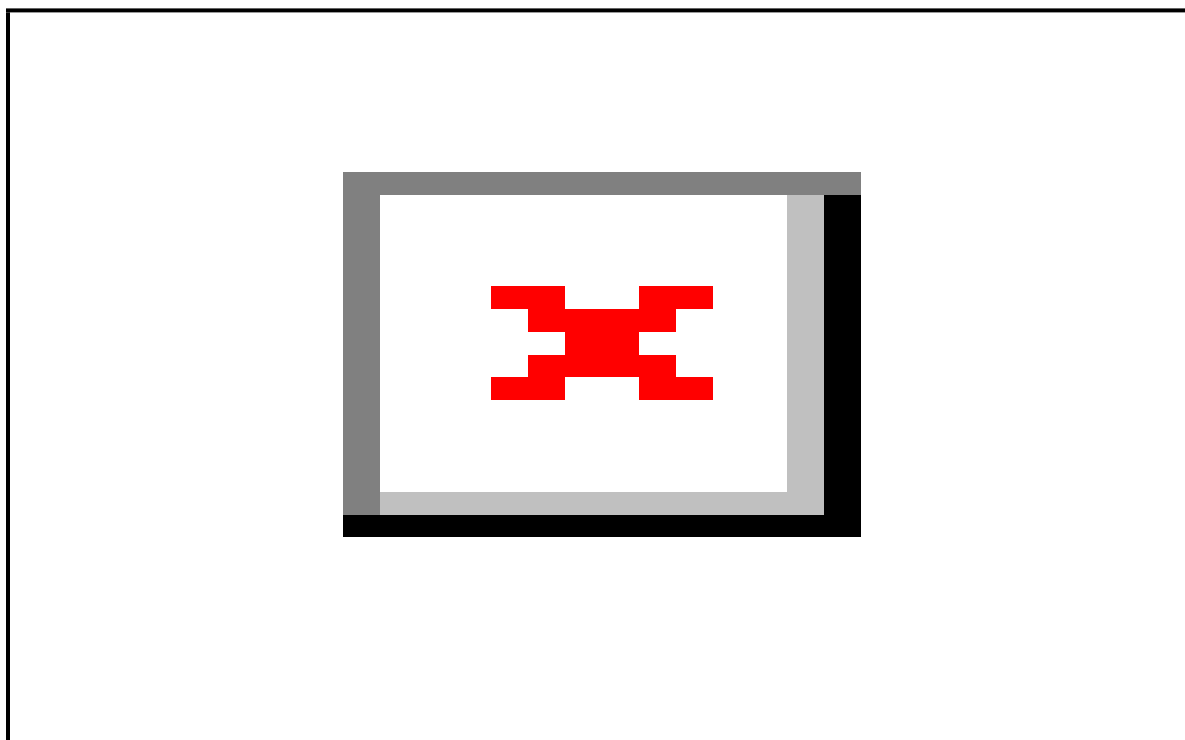

Fig. S27: GC MS spectra of compound 6

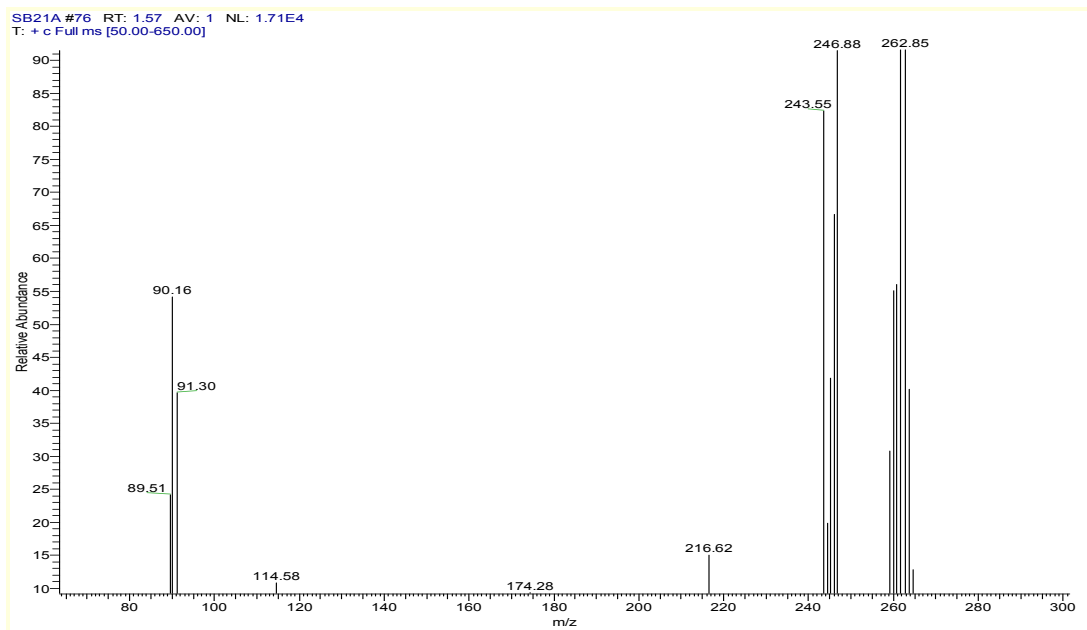

Fig. S28: GC MS spectra of compound 7

4. **Figures:** TG/DTA of the compounds is summarized below as Fig. S29

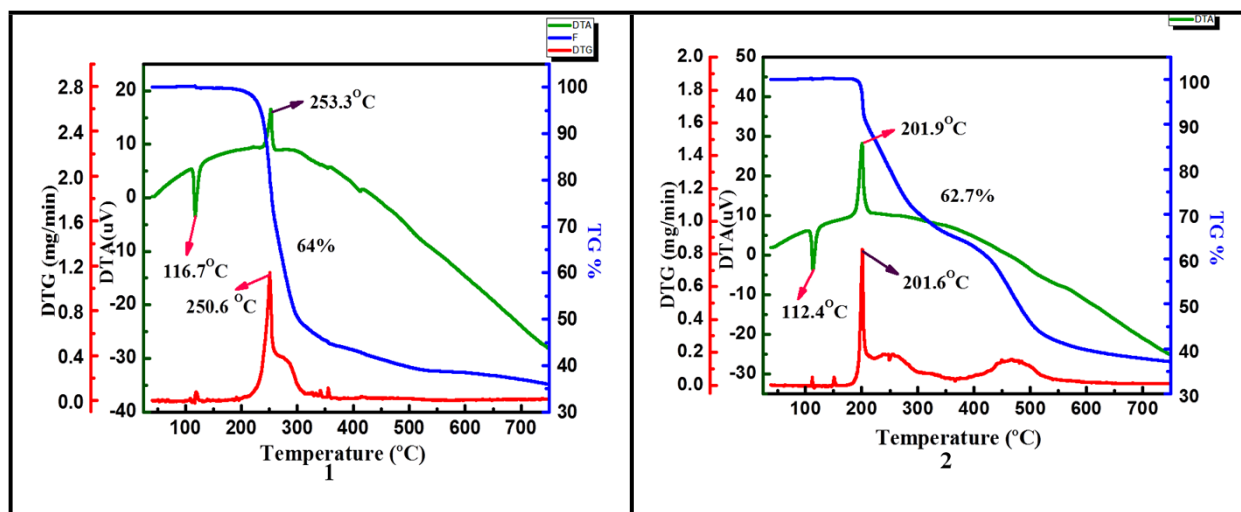

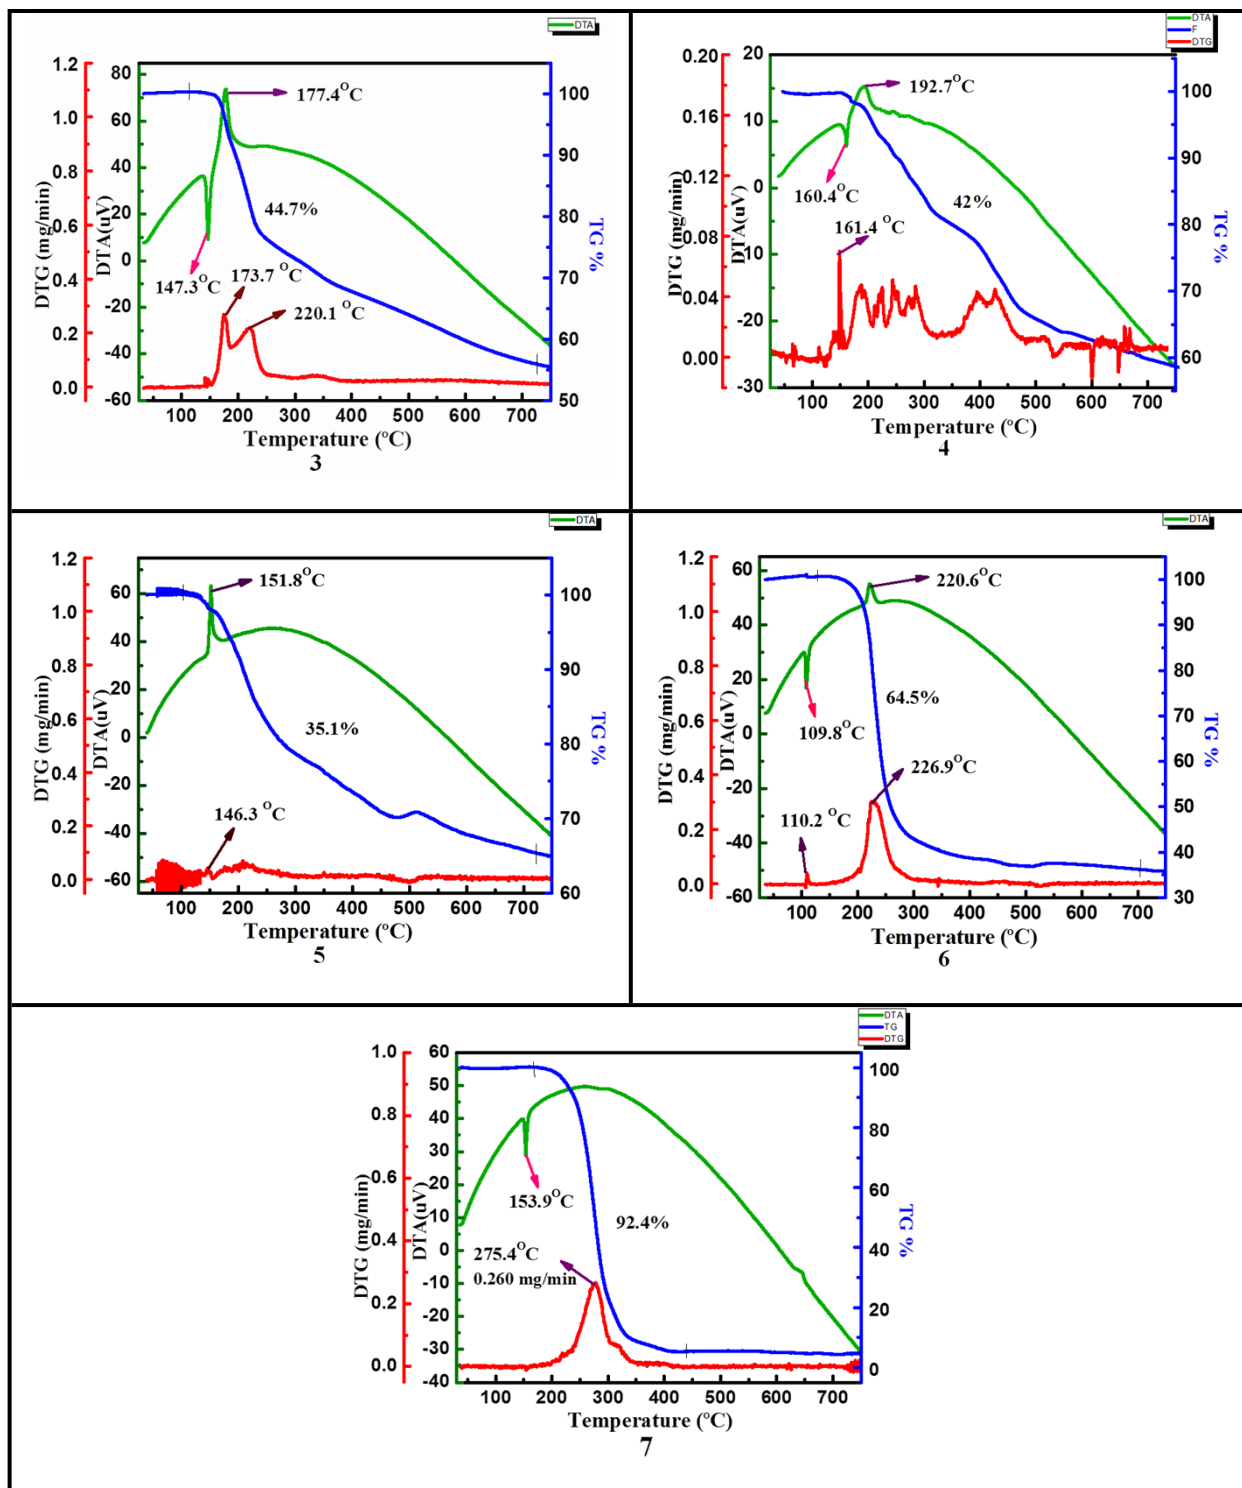

Fig. S29: TG/DTA of the compounds 1-7.
